# Supplementary material
Source: PubMed Central journal article supplement (PMC140048)
Supplement: nar_30_24_5407__1.pdf [file nar_30_24_5407__1.pdf]

## SUPPLEMENTARY MATERIAL

**Table S1.** Rate constants of the **D** triplex, obtained at different flow rates

| Flow rate ( $\mu\text{l}/\text{min}$ ) | $k_{\text{ass}}$ ( $\text{M}^{-1} \text{s}^{-1}$ ) | $K_{\text{diss}}$ ( $10^{-6} \text{s}^{-1}$ ) |
|----------------------------------------|----------------------------------------------------|-----------------------------------------------|
| 40                                     | $1430 \pm 27$                                      | $60 \pm 6$                                    |
| 20                                     | $1520 \pm 52$                                      | $58 \pm 6$                                    |
| 10                                     | $1420 \pm 23$                                      | $61 \pm 4$                                    |
| 5                                      | $1560 \pm 27$                                      | $60 \pm 3$                                    |

The measures were conducted in a 10mM sodium cacodylate buffer (pH6.2), 100 mM NaCl and 10 mM  $\text{MgCl}_2$ , at 30°C. 10 concentrations of TFO were used to determine the rate constants, as described in the manuscript.

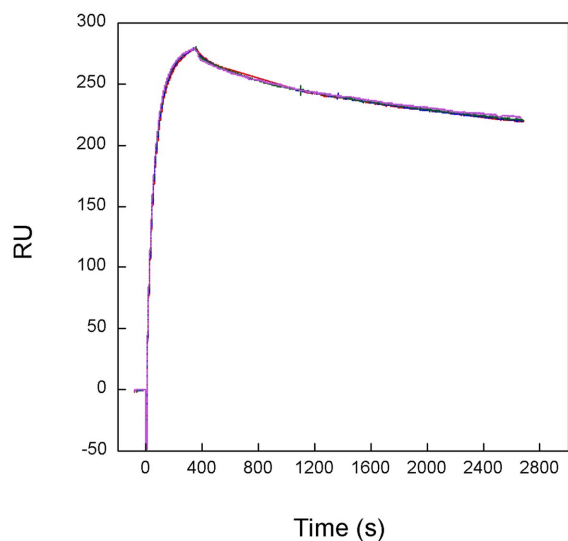

**Figure S1.** Sensorgrams obtained for the **D** system, on injection of 12  $\mu\text{M}$  TFO, at different flow rates (5, 10, 20, 40  $\mu\text{l}/\text{min}$ ): the sensorgrams are superimposable

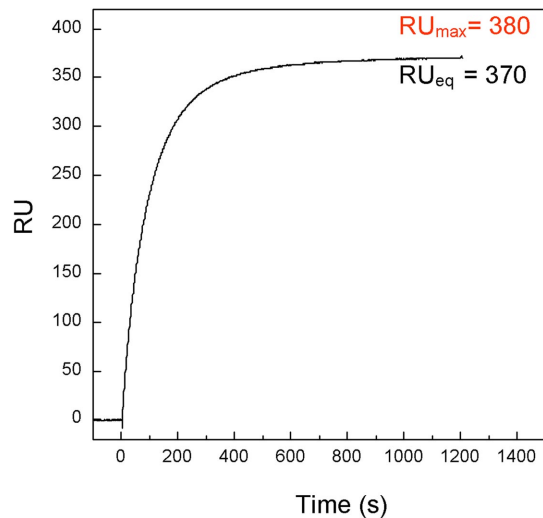

**Figure S2.** Predicted maximum SPR response ( $RU_{\max}$ ) and measured SPR response at equilibrium ( $RU_{\text{eq}}$ ) for the triplex system **D**, in a 10 mM sodium cacodylate buffer (pH6.2), 100 mM NaCl and 10mM  $MgCl_2$ , at a temperature of 20°C.  $RU_{\max}$  is the expected response if all of the binding sites at the sensor chip surface were saturated; it was calculated as  $RU_{\max} = [(TFO \text{ molecular weight}) / (DNA \text{ hairpin molecular weight})] \times (\text{response of DNA hairpin immobilized at the surface})$ .  $RU_{\text{eq}}$  is proportional to the amount of bound TFO at equilibrium. The ratio  $r = RU_{\text{eq}}/RU_{\max}$  provides the number of TFO bound to each DNA hairpin attached to the sensor chip surface. A value  $r = 1$  is indicative of a stoichiometry 1:1 for the system TFO/DNA hairpin duplex.

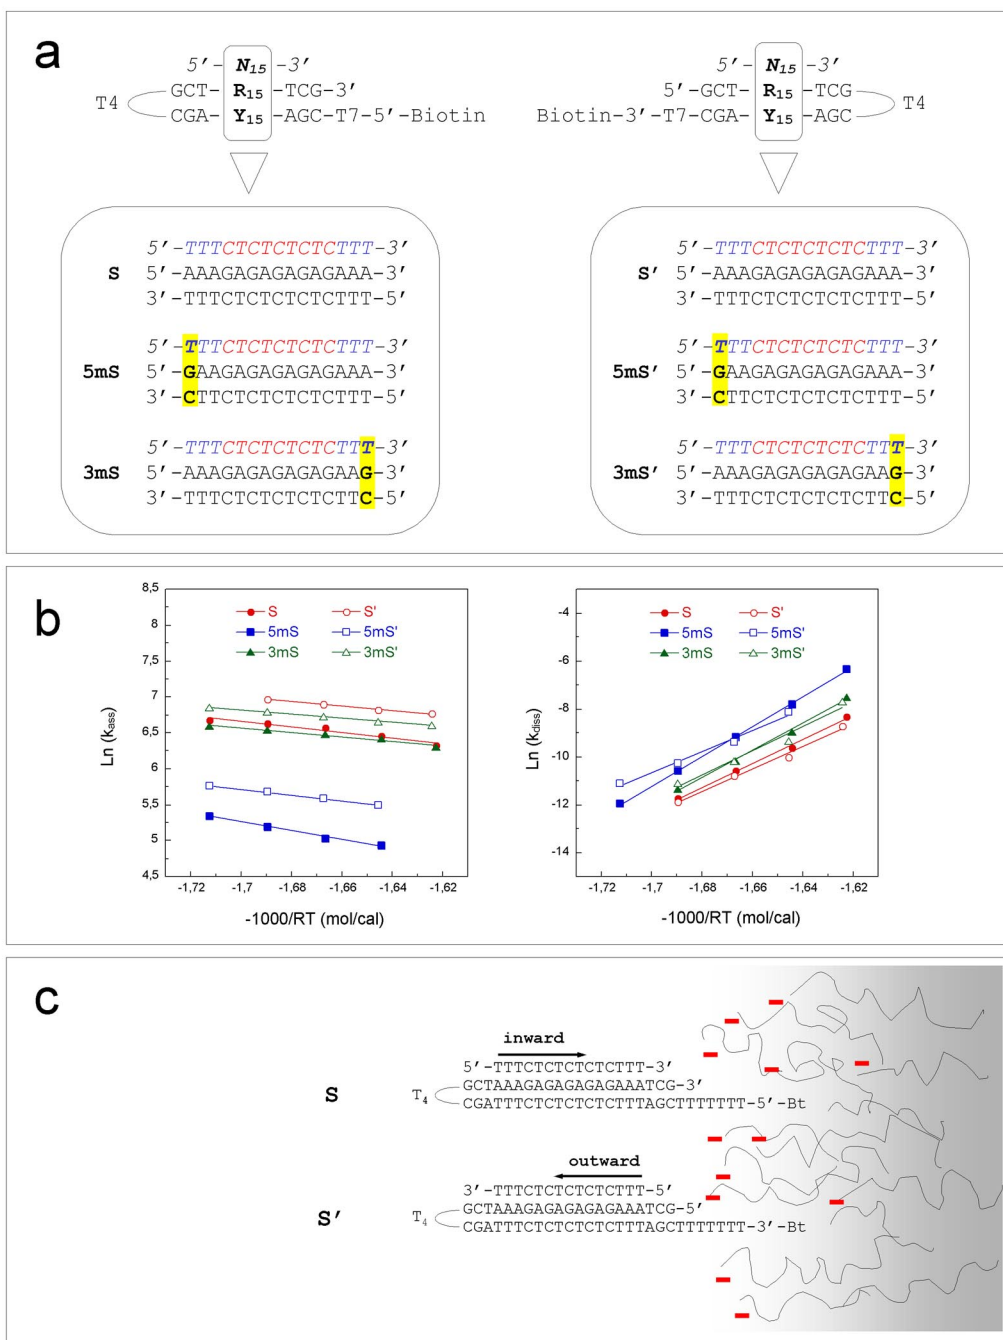

**Figure S3.** (a) SPR experiments were performed on two symmetrical systems differing in the position of the hairpin loop, located at at the 5'-side (left) and 3'-side (right) of the oligopurine strand, respectively. (b) Arrhenius plots of the rate constants of the two symmetrical systems. The

measures were performed in a 10 mM sodium cacodylate buffer (pH6.2), 100 mM NaCl and 10 mM MgCl<sub>2</sub>. (c) Schematic illustration of the triplexes **S** and **S'** at the sensor chip surface. The directional nucleation-zipping model could explain the influence of the location of hairpin loop on the association rate constants: a directional triple helix formation should take place inward (when the loop was at the 5'-side of the oligopurine strand) or outward (when the loop was at the 3'-side of the oligopurine strand) from the sensor chip surface. Negatively charged carboxymethylated dextran layer might concentrate a higher amount of TFOs, therefore it should enhance the nucleation at the 5'-side of triplex closer to the surface.
